# Supplementary material for: Simulation of a conventional water treatment plant for the minimization of new emerging pollutants in drinking water sources: process optimization using response surface methodology
Source: Royal Society of Chemistry journal article supplement (doi:10.1039/c6ra27733k), 2017-01-01
Supplement: c6ra27733k1.pdf [file c6ra27733k1.pdf]

**Table S1.** Characteristics of raw water collected from Skudai river at the inflow of water treatment plant.

| Parameter                            | Range     |
|--------------------------------------|-----------|
| Turbidity (NTU)                      | 228       |
| TOC (mg/L)                           | 2.9       |
| pH                                   | 6.02      |
| Alkalinity (mg CaCO <sub>3</sub> /L) | 75-80     |
| UV absorbance (cm <sup>-1</sup> )    | 0.09-0.10 |
| BOD (mg/L)                           | 6.0       |
| COD (mg/L)                           | 9.0       |

<sup>TOC</sup> Total organic carbon, <sup>BOD</sup> Biological oxygen demand, <sup>COD</sup> Chemical oxygen demand.

**Table S2.** A list of non-targeted NEPs and their concentrations found in river water those are not included in RSM model.

| Name of NEP  | Amount found in water sample (mg/L) | Major sources to discharge into river water       | Health effects                                          |
|--------------|-------------------------------------|---------------------------------------------------|---------------------------------------------------------|
| Benzene      | 0.12                                | Factories, landfills, gas storage tanks etc.      | Anemia, risk of cancer,                                 |
| Fluorides    | 1.62                                | Fertilizer factories and aluminum factories.      | Dental Problems, bone fractures                         |
| Toluene      | 0.18                                | Discharge from petrol refineries                  | Affects nervous system                                  |
| Ethylbenzene | 0.35                                | Industrial discharge, pesticides and paints etc., | Reproductive damage                                     |
| Xylene       | 0.68                                | Petroleum products, plastics etc.                 | Skin irritation, respiratory problems.                  |
| Bisphenol-A  | 0.54                                | Water supply pipes, food cans, bottle caps etc.,  | Affects brain, behavior, and prostate glands in fetuses |
| Dodecene     | 1.02                                | Skin care products                                | Affects uterine functioning in animals                  |
| Ibuprofen    | 5.32                                | Excretion, disposal etc.                          | Expected carcinogenicity                                |
